# Supplementary material
Source: MDPI journal article supplement (https://www.mdpi.com/2071-1050/12/18/7775)
Supplement: s1 [file s1]

**QUESTIONNAIRE**

Date « \_\_\_\_ » \_\_\_\_\_

Start time \_\_\_\_:\_\_\_\_

End time \_\_\_\_:\_\_\_\_

Interview length \_\_\_\_\_ min

|                     |  |
|---------------------|--|
| Interviewer's name: |  |
|---------------------|--|

**Dear Participant,**

The aim of the study is to identify individual characteristics that contribute to the "transition" to cycling. The results of the study will be used to improve transport policy in Bishkek, as well as to write academic papers. We do not collect identifiable personal data, such as names or addresses. The survey takes about 30 minutes and typical questions include the following aspects: individual (gender, age, hobbies), social (marital status, work, income level), cycling (frequency, time, distance, habits). There are no right or wrong answers, so please tell us your opinion. All collected data will be processed in a generalized form, all information is anonymous and confidential.

## **Module I: Cycling**

**Q1 Do you cycle?**

- 1. Yes
- 0. No (*TRANSIT TO Q11*)

**Q2 For what ONE main purpose do you use a bicycle?**

- 1. For a trip to work or study
- 2. For recreation

**Q3. How many years since you cycle?**

- 1. \_\_\_\_\_ years
- 2. Don't know

**Q4. How many minutes per week do you spend on a bike?**

- 1. \_\_\_\_\_ minutes

**Q5. How many approximately kilometers per week?**

- 1. \_\_\_\_\_ km
- 2. Don't know

**Q6. Do you own a bicycle?**

1. Yes
2. No, I rent (transfer to **Q9**)
3. No, I use for free from somebody (transfer to **Q9**)

**Q7. What is your bicycle price, i.e. a new one?**

1. \_\_\_\_\_soms

**Q8. What is the annual maintenance cost, including repair and other expenses?**

1. \_\_\_\_\_soms

**Q9. Evaluate the following statements about your personal reasons to cycle? 1-absolutely agree and 5 being absolutely disagree. (READ THE STATEMENTS, SHOW THE CARD #1)**

|                                                        | 1 | 2 | 3 | 4 | 5 | I don't know |
|--------------------------------------------------------|---|---|---|---|---|--------------|
| 9.1 I cycle because it is good for my health           | 1 | 2 | 3 | 4 | 5 | 99           |
| 9.2 I cycle because the public transport state is poor | 1 | 2 | 3 | 4 | 5 | 99           |
| 9.3 I cycle because it is economical                   | 1 | 2 | 3 | 4 | 5 | 99           |
| 9.4 I cycle because many of my friends cycle           | 1 | 2 | 3 | 4 | 5 | 99           |
| 9.5 I cycle because my family members cycle            | 1 | 2 | 3 | 4 | 5 | 99           |
| 9.6 I cycle because I do not have a car                | 1 | 2 | 3 | 4 | 5 | 99           |

**Q10. What are challenges or obstacles for you as a cyclist. ? 1-absolutely agree and 5 being absolutely disagree. (READ THE OPTIONS, SHOW THE CARD #1)**

|                                        | 1 | 2 | 3 | 4 | 5 | I don't know |
|----------------------------------------|---|---|---|---|---|--------------|
| 10.1 Not many or absence of bike lanes | 1 | 2 | 3 | 4 | 5 | 99           |
| 10.2 Danger from private cars          | 1 | 2 | 3 | 4 | 5 | 99           |
| 10.3 Danger from <i>marshrutkas</i>    | 1 | 2 | 3 | 4 | 5 | 99           |
| 10.4 Pedestrians                       | 1 | 2 | 3 | 4 | 5 | 99           |
| 10.5 Polluted air                      | 1 | 2 | 3 | 4 | 5 | 99           |
| 10.6 Lack of bicycle parking           | 1 | 2 | 3 | 4 | 5 | 99           |

**TRANSIT TO MODULE II**

**Q11. 1-absolutely agree and 5 being absolutely disagree. (READ THE OPTIONS, SHOW THE CARD #1)**

|                                        | 1 | 2 | 3 | 4 | 5 | I don't know |
|----------------------------------------|---|---|---|---|---|--------------|
| 11.1 Not many or absence of bike lanes | 1 | 2 | 3 | 4 | 5 | 99           |
| 11.2 Danger from private cars          | 1 | 2 | 3 | 4 | 5 | 99           |
| 11.3 Danger from <i>marshrutkas</i>    | 1 | 2 | 3 | 4 | 5 | 99           |
| 11.4 Pedestrians                       | 1 | 2 | 3 | 4 | 5 | 99           |
| 11.5 Do not have enough cycling skills | 1 | 2 | 3 | 4 | 5 | 99           |
| 11.6 I am too old                      | 1 | 2 | 3 | 4 | 5 | 99           |
| 11.7 I do not like cycling             | 1 | 2 | 3 | 4 | 5 | 99           |
| 11.8 Ashamed by what others might say  | 1 | 2 | 3 | 4 | 5 | 99           |
| 11.9 Not interested                    | 1 | 2 | 3 | 4 | 5 | 99           |
| 11.10 Polluted air                     | 1 | 2 | 3 | 4 | 5 | 99           |
| 11.11 Lack of bicycle parking          | 1 | 2 | 3 | 4 | 5 | 99           |
| 11.12 I do not have money for bicycle  | 1 | 2 | 3 | 4 | 5 | 99           |
| 11.13 No storage facilities            | 1 | 2 | 3 | 4 | 5 | 99           |
| 11.14 Other _____                      | 1 | 2 | 3 | 4 | 5 | 99           |

**Q12 How many minutes per day you spend to get to work or study?**

\_\_\_\_\_ min

**Q13 How do you get there? Mode of transport**

1. Walk
2. Own car
3. Friend, colleague or family member gives a ride
4. Public transport

**Module II: Profile**

**Q14 Evaluate the following statements. (READ THE STATEMENTS, SHOW THE CARD #1))**

|                                                              | 1 | 2 | 3 | 4 | 5 | I don't know |
|--------------------------------------------------------------|---|---|---|---|---|--------------|
| 14.1 The air in Bishkek is polluted because of too many cars | 1 | 2 | 3 | 4 | 5 | 99           |
| 14.2 I exercise regularly                                    | 1 | 2 | 3 | 4 | 5 | 99           |
| 14.3 Driving is comfortable                                  | 1 | 2 | 3 | 4 | 5 | 99           |
| 14.4 Driving is fun                                          | 1 | 2 | 3 | 4 | 5 | 99           |
| 14.5 Driving is good for health                              | 1 | 2 | 3 | 4 | 5 | 99           |
| 14.6 Driving is safe                                         | 1 | 2 | 3 | 4 | 5 | 99           |
| 14.7 Driving is good for the environment                     | 1 | 2 | 3 | 4 | 5 | 99           |
| 14.8 Cycling is comfortable                                  | 1 | 2 | 3 | 4 | 5 | 99           |
| 14.9 Cycling is fun                                          | 1 | 2 | 3 | 4 | 5 | 99           |
| 14.10 Cycling is good for health                             | 1 | 2 | 3 | 4 | 5 | 99           |
| 14.11 Cycling is safe                                        | 1 | 2 | 3 | 4 | 5 | 99           |
| 14.12 Cycling is good for the environment                    | 1 | 2 | 3 | 4 | 5 | 99           |
| 14.13 Public transport is comfortable                        | 1 | 2 | 3 | 4 | 5 | 99           |
| 14.14 Public transport is fun                                | 1 | 2 | 3 | 4 | 5 | 99           |
| 14.15 Public transport is good for health                    | 1 | 2 | 3 | 4 | 5 | 99           |
| 14.16 Public transport is safe                               | 1 | 2 | 3 | 4 | 5 | 99           |
| 14.17 Public transport is good for the environment           | 1 | 2 | 3 | 4 | 5 | 99           |

## Module III: Socio-economic profile

**Q15** (WRITE DOWN THE GENDER WITHOUT ASKING)

1. Female
2. Male

**Q16** How old are you in years: \_\_\_\_\_

**Q17** What is your height in cm? \_\_\_\_\_ cm

**Q18** What is your weight? \_\_\_\_\_ kg

**Q19** How many years you have been living in Bishkek? \_\_\_\_\_ years

**Q20 What is the highest level of your education?**

1. School
2. College
3. Incomplete University
4. University degree

**Q21 What is your marital status?**

1. Single
2. Married/Live together

**Q22 Do you have kids younger than 12 years old? \_\_\_\_\_**

**Q23 What is the type of your dwelling?**

1. Separate house
2. Flat in block of flats

**Q24 In which sector do you work?**

1. \_\_\_\_\_ (sector: e.g. private, public)
2. Unemployed
3. Student
4. Retired

**Q25 Do you have a car?**

1. Yes
2. No

**Q26 What is your monthly income?**

1. \_\_\_\_\_ som
2. 99

**Q27 What is your ethnicity?**

1. Kazakh
2. Kyrgyz
3. Russian
4. Uzbek
5. Other
